# Supplementary material
Source: ML conference proceedings conference paper supplement (https://openreview.net/forum?id=SEcSahl0Ql)
Supplement: supplementary_material [file attachment]

## Sheet: datasets
			ALTER							GEN							Parent		REF BEAMSIZE				TEST																	TRAIN
NOTES	NAME	EXPERIMENTS	fraction_delete	min_changes	max_changes	range_68_changes	min_var	max_var	range_68_var	max_distance	max_match_fraction	remove_or_alter	replace_misleading	replace_satisfied	load_from_alpha	load_from_beamsize	Parent	parent_model					changed_fraction	distance_all_mean	distance_all_median	distance_all_std	distance_broken_mean	distance_broken_median	distance_broken_std	distance_lower_10_fraction	distance_lower_50_fraction	match_fraction	num_samples	realizable_fraction	satisfied_fraction	satisfied_in_changed_fraction	satisfied_in_changed_sample_size	violated_fraction	fraction	changed_fraction	distance_all_mean	distance_all_median	distance_all_std	distance_broken_mean	distance_broken_median	distance_broken_std	distance_lower_10_fraction	distance_lower_50_fraction	match_fraction
	scpa-repair-alter-0		0.2	1	50	15	0	61	40								scpa-2						1	16.95	14	12.3	16.95	14	12.3	0.32	0.98	0	25000	0.5	0	0.01525	4000	0	0.1	1	16.96	14	12.23	16.96	14	12.23	0.31	0.98	0
	scpa-repair-alter-1	exp-repair-alter-1-0	0.2	1	50	15	0	61	20								scpa-2						1	16.01	13	12.09	16.01	13	12.09	0.35	0.98	0	25000	0.5	0	0.01875	4000	0	0.1	1	15.99	13	12.1	15.99	13	12.1	0.35	0.98	0
	scpa-repair-alter-2		0.2	1	50	15	0	61	10								scpa-2						1	14.83	12	11.87	14.84	12	11.87	0.4	0.99	0	25000	0.5	0	0.017	4000	0	0.1	1	14.82	12	11.95	14.82	12	11.95	0.4	0.99	0
	scpa-repair-alter-3		0.1	1	50	15	0	61	40								scpa-2						1	13.94	12	9.56	13.95	12	9.56	0.38	1	0	25000	0.5	0	0.0165	4000	0	0.1	1	13.96	12	9.55	13.96	12	9.55	0.38	1	0
	scpa-repair-alter-4	x	0.1	1	50	15	0	61	20								scpa-2						1	12.73	11	9.26	12.74	11	9.26	0.44	1	0	25000	0.5	0	0.01475	4000	0	0.1	1	12.83	11	9.33	12.83	11	9.33	0.43	1	0
	scpa-repair-alter-5		0.1	1	50	15	0	61	10								scpa-2						1	11.55	9	9	11.56	9	9	0.5	1	0	25000	0.5	0	0.0185	4000	0	0.1	1	11.56	9	9.04	11.56	9	9.04	0.51	1	0
	scpa-repair-alter-6	x	1	1	20	5											scpa-2						1	19.65	17	13.9	19.66	17	13.9	0.29	0.96	0	25000	0.5	0	0.01175	4000	0	0.1	1	19.76	17	14.03	19.76	17	14.03	0.29	0.96	0
	scpa-repair-alter-9		0.8	1	20	5	0	61	40								scpa-2						1	17.45	15	12.47	17.45	15	12.47	0.32	0.98	0	25000	0.5	0	0.01925	4000	0	0.1	1	17.31	15	12.4	17.31	15	12.4	0.32	0.98	0
	scpa-repair-alter-10	x	0.8	1	20	5	0	61	20								scpa-2						1	16.78	14	12.45	16.78	14	12.45	0.34	0.98	0	25000	0.5	0	0.01675	4000	0	0.1	1	16.94	15	12.55	16.94	15	12.55	0.34	0.98	0
	scpa-repair-alter-11		0.8	1	20	5	0	61	10								scpa-2						1	16.43	14	12.6	16.44	14	12.6	0.36	0.98	0	25000	0.5	0	0.0175	4000	0	0.1	1	16.53	14	12.71	16.54	14	12.71	0.35	0.98	0
	scpa-repair-alter-12		0.2	1	20	5	0	61	40								scpa-2						1	9.03	7	6.69	9.03	7	6.69	0.61	1	0	25000	0.5	0	0.0325	4000	0	0.1	1	8.98	7	6.7	8.98	7	6.7	0.62	1	0
	scpa-repair-alter-13	exp-repair-alter-13-0	0.2	1	20	5	0	61	20								scpa-2						1	8.21	6	6.63	8.21	6	6.63	0.65	1	0	25000	0.5	0	0.039	4000	0	0.1	1	8.2	6	6.64	8.2	6	6.63	0.65	1	0
	scpa-repair-alter-14		0.2	1	20	5	0	61	10								scpa-2						1	7.48	5	6.57	7.48	5	6.57	0.67	1	0	25000	0.5	0	0.0385	4000	0	0.1	1	7.5	5	6.59	7.5	5	6.59	0.67	1	0
	scpa-repair-alter-15		0.2	1	100	50	0	61	40								scpa-2						1	32.47	26	23.56	32.47	26	23.56	0.11	0.8	0	25000	0.5	0	0.007	4000	0	0.1	1	32.73	26	23.93	32.73	26	23.93	0.11	0.8	0
	scpa-repair-alter-16	exp-repair-alter-16-0	0.2	1	100	50	0	61	20								scpa-2						1	31.35	25	23.8	31.36	25	23.8	0.13	0.81	0	25000	0.5	0	0.00625	4000	0	0.1	1	31.51	25	23.86	31.51	25	23.86	0.13	0.81	0
	scpa-repair-alter-17		0.2	1	100	50	0	61	10								scpa-2						1	30.11	24	23.98	30.11	24	23.98	0.16	0.82	0	25000	0.5	0	0.0085	4000	0	0.1	1	30.1	24	23.73	30.11	24	23.73	0.16	0.82	0
	scpa-repair-alter-18		0	1	100	50	0	61	40								scpa-2						1	20.96	19	12.4	20.96	19	12.4	0.17	0.97	0	25000	0.5	0	0.00825	4000	0	0.1	1	21.11	19	12.53	21.11	19	12.53	0.17	0.97	0
	scpa-repair-alter-19	exp-repair-alter-19-0	0	1	100	50	0	61	20								scpa-2						1	19.06	17	11.65	19.06	17	11.65	0.2	0.98	0	25000	0.5	0	0.005	4000	0	0.1	1	19.18	17	11.74	19.18	17	11.74	0.2	0.98	0
	scpa-repair-alter-20		0	1	100	50	0	61	10								scpa-2						1	16.63	15	10.46	16.63	15	10.46	0.26	0.99	0	25000	0.5	0	0.00925	4000	0	0.1	1	16.62	15	10.45	16.62	15	10.45	0.26	0.99	0
	scpa-repair-alter-21	exp-repair-alter-21-0	1	1	40	15											scpa-2						1	33.51	25	28.23	33.51	25	28.23	0.17	0.77	0	25000	0.5	0	0.00475	4000	0	0.1	1	33.65	25	28.16	33.65	25	28.16	0.17	0.77	0
	scpa-repair-gen-0									50	1	remove	FALSE	TRUE	0.5	1	scpa-2	repair-data-2					0	7.12	0	13.47	23.92	24	14.43	0.76	1	0.7	18888	0.51	0			0.3	0.0698541	0	6	0	12.57	23.41	23	14.48	0.8	1	0.74
	scpa-repair-gen-1	exp-repair-gen-1-0	0.2	1	50	15	0	61	20	50	0.1	alter	FALSE	TRUE	0.5	1	scpa-2	repair-data-2					0.67	16.01	13	13.61	17.79	15	13.19	0.38	0.98	0.1	24563	0.5	0	0.016	4000	0.23	0.100023	0.69	15.52	13	13.25	17.25	14	12.86	0.39	0.99	0.1
	scpa-repair-gen-2	exp-repair-gen-2-0	0.2	1	50	15	0	61	20	50	0	alter	FALSE	TRUE	0.5	1	scpa-2	repair-data-2					0.77	17.36	14	12.94	17.36	14	12.94	0.33	0.98	0	24563	0.5	0	0.018	4000	0.23	0.100023	0.79	16.9	14	12.63	16.9	14	12.63	0.33	0.99	0
	scpa-repair-gen-3		0.2	1	50	15	0	61	20	50	0.3	alter	FALSE	TRUE	0.5	1	scpa-2	repair-data-2					0.47	13.15	9	14.34	18.79	16	13.7	0.51	0.99	0.3	24563	0.5	0	0.01575	4000	0.23	0.100023	0.49	12.78	9	14.04	18.26	15	13.47	0.52	0.99	0.3
	scpa-repair-gen-4									50	0.1	remove	FALSE	TRUE	0.5	1	scpa-2	repair-data-2					0	21.53	21	15.46	23.92	24	14.43	0.27	0.99	0.1	6244	0.52	0			0.9	0.0764157	0	21.07	21	15.43	23.41	23	14.48	0.28	0.99	0.1
	scpa-repair-gen-5									50	0	remove	FALSE	TRUE	0.5	1	scpa-2	repair-data-2					0	23.92	24	14.43	23.92	24	14.43	0.19	0.98	0	5620	0.52	0			1	0.07642	0	23.41	23	14.48	23.41	23	14.48	0.2	0.98	0
	scpa-repair-gen-6									50	0.3	remove	FALSE	TRUE	0.5	1	scpa-2	repair-data-2					0	16.74	14	16.31	23.92	24	14.43	0.43	0.99	0.3	8029	0.51	0			0.7	0.0764223	0	16.39	13	16.18	23.41	23	14.48	0.44	0.99	0.3
	scpa-repair-gen-7									20	1	remove	FALSE	TRUE	0.5	1	scpa-2	repair-data-2					0	1.49	0	4.31	9.75	11	6.39	0.91	1	0.85	15666	0.51	0			0.15	0.0684332	0	1.29	0	4.03	9.7	11	6.39	0.93	1	0.87
	scpa-repair-gen-8	exp-repair-gen-8-0	0.2	1	20	15	0	61	20	20	0.1	alter	FALSE	TRUE	0.5	1	scpa-2	repair-data-2					0.8	13.46	11	11.61	14.95	13	11.28	0.43	0.99	0.1	24563	0.5	0	0.01875	4000	0.1	0.100023	0.81	13.45	11	11.63	14.94	13	11.31	0.43	0.99	0.1
	scpa-repair-gen-9	exp-repair-gen-9-0	0.2	1	20	15	0	61	20	20	0	alter	FALSE	TRUE	0.5	1	scpa-2	repair-data-2					0.9	14.78	13	11.19	14.78	13	11.19	0.37	0.99	0	24563	0.5	0	0.0155	4000	0.1	0.100023	0.91	14.76	12	11.18	14.76	12	11.18	0.38	0.99	0
	scpa-repair-gen-10		0.2	1	20	15	0	61	20	20	0.3	alter	FALSE	TRUE	0.5	1	scpa-2	repair-data-2					0.6	10.75	7	12.07	15.35	13	11.73	0.55	0.99	0.3	24563	0.5	0	0.0185	4000	0.1	0.100023	0.61	10.71	7	12.02	15.29	13	11.67	0.55	0.99	0.3
	scpa-repair-gen-11									20	0.1	remove	FALSE	TRUE	0.5	1	scpa-2	repair-data-2					0	8.78	10	6.73	9.75	11	6.39	0.5	1	0.1	2664	0.57	0			0.9	0.0747538	0	8.73	9	6.72	9.7	11	6.39	0.51	1	0.1
	scpa-repair-gen-12									20	0	remove	FALSE	TRUE	0.5	1	scpa-2	repair-data-2					0	9.75	11	6.39	9.75	11	6.39	0.44	1	0	2398	0.57	0			1	0.0747669	0	9.7	11	6.39	9.7	11	6.39	0.46	1	0
	scpa-repair-gen-13									20	0.3	remove	FALSE	TRUE	0.5	1	scpa-2	repair-data-2					0	6.83	4	6.97	9.75	11	6.39	0.61	1	0.3	3426	0.55	0			0.7	0.0747725	0	6.79	4	6.95	9.7	11	6.39	0.62	1	0.3
	scpa-repair-gen-14									100	1	remove	FALSE	TRUE	0.5	1	scpa-2	repair-data-2					0	17.11	0	27.26	42.34	38	27.76	0.64	0.84	0.6	22267	0.5	0			0.4	0.0708772	0	14.72	0	25.97	41.75	37	28.01	0.69	0.87	0.65
	scpa-repair-gen-15	exp-repair-gen-15-0	0.2	1	100	15	0	61	20	100	0.1	alter	FALSE	TRUE	0.5	1	scpa-2	repair-data-2					0.53	23.32	15	24.01	25.92	17	23.95	0.35	0.85	0.1	24563	0.5	0	0.01725	4000	0.37	0.100023	0.58	21.94	14	23.02	24.38	16	23.01	0.36	0.87	0.1
	scpa-repair-gen-16	exp-repair-gen-16-0	0.2	1	100	15	0	61	20	100	0	alter	FALSE	TRUE	0.5	1	scpa-2	repair-data-2					0.63	24.77	17	23.23	24.77	17	23.23	0.29	0.85	0	24563	0.5	0	0.02	4000	0.37	0.100023	0.68	23.29	16	22.28	23.29	16	22.28	0.3	0.87	0
	scpa-repair-gen-17		0.2	1	100	15	0	61	20	100	0.3	alter	FALSE	TRUE	0.5	1	scpa-2	repair-data-2					0.33	20.61	11	25.28	29.45	21	25.55	0.47	0.85	0.3	24563	0.5	0	0.01775	4000	0.37	0.100023	0.38	19.2	10	24.2	27.44	19	24.72	0.48	0.87	0.3
	scpa-repair-gen-18									100	0.1	remove	FALSE	TRUE	0.5	1	scpa-2	repair-data-2					0	38.11	34	29.24	42.34	38	27.76	0.21	0.65	0.1	9999	0.5	0			0.9	0.0767106	0	37.57	33	29.37	41.75	37	28.01	0.22	0.66	0.1
	scpa-repair-gen-19									100	0	remove	FALSE	TRUE	0.5	1	scpa-2	repair-data-2					0	42.34	38	27.76	42.34	38	27.76	0.12	0.61	0	8999	0.5	0			1	0.07671	0	41.75	37	28.01	41.75	37	28.01	0.13	0.62	0
	scpa-repair-gen-20									100	0.3	remove	FALSE	TRUE	0.5	1	scpa-2	repair-data-2					0	29.64	22	30.27	42.34	38	27.76	0.38	0.73	0.3	12856	0.5	0			0.7	0.0767115	0	29.22	21	30.25	41.75	37	28.01	0.39	0.74	0.3
	scpa-repair-gen-21									50	1	remove	FALSE	FALSE	0.5	1	scpa-2	repair-data-2					0	12.49	2	15.46	22.84	22	14.16	0.56	0.99	0.45	16855	0.54	0.21			0.33	0.069241	0	10.4	0	14.77	22.43	22	14.16	0.63	0.99	0.54
	scpa-repair-gen-22		0.2	1	50	15	0	61	20	50	0.1	alter	FALSE	FALSE	0.5	1	scpa-2	repair-data-2					0.52	17.12	14	14.19	19.02	16	13.7	0.36	0.98	0.1	24563	0.5	0.15	0.01725	4000	0.23	0.100023	0.56	16.5	13	13.96	18.34	15	13.52	0.38	0.98	0.1
	scpa-repair-gen-23		0.2	1	50	15	0	61	20	50	0	alter	FALSE	FALSE	0.5	1	scpa-2	repair-data-2					0.62	18.28	15	13.47	18.28	15	13.47	0.31	0.98	0	24563	0.5	0.15	0.01925	4000	0.23	0.100023	0.66	17.74	15	13.26	17.74	15	13.26	0.32	0.98	0
	scpa-repair-gen-24									50	0.1	remove	FALSE	FALSE	0.5	1	scpa-2	repair-data-2					0	20.56	20	15.08	22.84	22	14.16	0.28	0.99	0.1	10238	0.45	0.35			0.55	0.0762193	0	20.19	19	15.03	22.43	22	14.16	0.29	0.99	0.1
	scpa-repair-gen-25									50	0	remove	FALSE	FALSE	0.5	1	scpa-2	repair-data-2					0	22.84	22	14.16	22.84	22	14.16	0.2	0.98	0	9214	0.43	0.39			0.61	0.076218	0	22.43	22	14.16	22.43	22	14.16	0.21	0.99	0
	scpa-repair-gen-26									20	1	remove	FALSE	FALSE	0.5	1	scpa-2	repair-data-2					0	3.56	0	6.09	9.94	12	6.34	0.79	1	0.64	11899	0.6	0.16			0.2	0.0664663	0	2.88	0	5.65	9.87	11	6.37	0.84	1	0.71
	scpa-repair-gen-27		0.2	1	20	15	0	61	20	20	0.1	alter	FALSE	FALSE	0.5	1	scpa-2	repair-data-2					0.73	13.46	11	11.92	14.95	13	11.64	0.43	0.99	0.1	24563	0.5	0.08	0.01775	4000	0.1	0.100023	0.74	13.42	11	11.84	14.91	13	11.55	0.43	0.99	0.1
	scpa-repair-gen-28		0.2	1	20	15	0	61	20	20	0	alter	FALSE	FALSE	0.5	1	scpa-2	repair-data-2					0.83	14.6	12	11.28	14.6	12	11.28	0.38	0.99	0	24563	0.5	0.08	0.01825	4000	0.1	0.100023	0.84	14.65	12	11.37	14.65	12	11.37	0.38	0.99	0
	scpa-repair-gen-29									20	0.1	remove	FALSE	FALSE	0.5	1	scpa-2	repair-data-2					0	8.94	10	6.72	9.94	12	6.34	0.48	1	0.1	4731	0.49	0.39			0.51	0.0753776	0	8.89	10	6.73	9.87	11	6.37	0.49	1	0.1
	scpa-repair-gen-30									20	0	remove	FALSE	FALSE	0.5	1	scpa-2	repair-data-2					0	9.94	12	6.34	9.94	12	6.34	0.43	1	0	4258	0.47	0.44			0.56	0.0753788	0	9.87	11	6.37	9.87	11	6.37	0.44	1	0
	scpa-repair-gen-31									100	1	remove	FALSE	FALSE	0.5	1	scpa-2	repair-data-2					0	25.57	15	29.15	39.65	34	27.56	0.44	0.78	0.36	21515	0.51	0.23			0.42	0.0707807	0	22.12	6	28.56	39.25	33	27.84	0.51	0.81	0.44
	scpa-repair-gen-32		0.2	1	100	15	0	61	20	100	0.1	alter	FALSE	FALSE	0.5	1	scpa-2	repair-data-2					0.34	27.34	19	26.25	30.39	22	25.94	0.31	0.8	0.1	24563	0.5	0.2	0.01975	4000	0.37	0.100023	0.4	25.47	17	25.48	28.3	20	25.32	0.33	0.82	0.1
	scpa-repair-gen-33		0.2	1	100	15	0	61	20	100	0	alter	FALSE	FALSE	0.5	1	scpa-2	repair-data-2					0.44	28.58	20	25.38	28.58	20	25.38	0.25	0.8	0	24563	0.5	0.2	0.0155	4000	0.37	0.100023	0.5	26.7	18	24.65	26.7	18	24.65	0.27	0.82	0
	scpa-repair-gen-34									100	0.1	remove	FALSE	FALSE	0.5	1	scpa-2	repair-data-2					0	35.69	30	28.72	39.65	34	27.56	0.22	0.69	0.1	15416	0.45	0.32			0.58	0.0764709	0	35.33	29	28.92	39.25	33	27.84	0.23	0.69	0.1
	scpa-repair-gen-35									100	0	remove	FALSE	FALSE	0.5	1	scpa-2	repair-data-2					0	39.65	34	27.56	39.65	34	27.56	0.13	0.65	0	13874	0.42	0.35			0.65	0.0764694	0	39.25	33	27.84	39.25	33	27.84	0.14	0.66	0
	scpa-repair-gen-36									50	1	remove	FALSE	TRUE	0.5	3	scpa-2	repair-data-2					0	9.01	0	14.01	19.84	18	14.75	0.67	1	0.55	55164	0.5	0			0.45	0.0699771	0	8.02	0	13.29	18.52	15	14.62	0.7	1	0.57
	scpa-repair-gen-37	exp-repair-gen-37-0	0.2	1	50	15	0	61	20	50	0.1	alter	FALSE	TRUE	0.5	3	scpa-2	repair-data-2					0.56	15.88	13	13.8	17.64	15	13.43	0.39	0.99	0.1	72805	0.5	0	0.0195	4000	0.34	0.100095	0.56	15.41	12	13.62	17.12	14	13.29	0.4	0.99	0.1
	scpa-repair-gen-38	exp-repair-gen-38-0	0.2	1	50	15	0	61	20	50	0	alter	FALSE	TRUE	0.5	3	scpa-2	repair-data-2					0.66	17.37	14	13.25	17.37	14	13.25	0.33	0.98	0	72805	0.5	0	0.017	4000	0.34	0.100095	0.66	16.81	14	13.04	16.82	14	13.04	0.34	0.99	0
	scpa-repair-gen-39		0.2	1	50	15	0	61	20	50	0.3	alter	FALSE	TRUE	0.5	3	scpa-2	repair-data-2					0.36	13.08	9	14.58	18.69	16	14.1	0.51	0.99	0.3	72805	0.5	0	0.018	4000	0.34	0.100095	0.36	12.53	8	14.23	17.9	15	13.89	0.52	0.99	0.3
	scpa-repair-gen-40									50	0.1	remove	FALSE	TRUE	0.5	3	scpa-2	repair-data-2					0	17.86	15	15.21	19.84	18	14.75	0.35	0.99	0.1	27826	0.59	0			0.89	0.0719604	0	16.67	13	14.94	18.52	15	14.62	0.38	0.99	0.1
	scpa-repair-gen-41									50	0	remove	FALSE	TRUE	0.5	3	scpa-2	repair-data-2					0	19.84	18	14.75	19.84	18	14.75	0.28	0.99	0	25043	0.61	0			0.99	0.0719597	0	18.52	15	14.62	18.52	15	14.62	0.31	0.99	0
	scpa-repair-gen-42									50	0.3	remove	FALSE	TRUE	0.5	3	scpa-2	repair-data-2					0	13.89	10	15.33	19.84	18	14.75	0.5	0.99	0.3	35776	0.55	0			0.69	0.0719602	0	12.96	6	14.89	18.52	15	14.62	0.52	0.99	0.3
	scpa-repair-gen-43									20	1	remove	FALSE	TRUE	0.5	3	scpa-2	repair-data-2					0	2.5	0	5.16	8.08	8	6.4	0.85	1	0.69	43625	0.5	0			0.3	0.0685016	0	2.4	0	5.04	7.8	7	6.36	0.86	1	0.69
	scpa-repair-gen-44	exp-repair-gen-44-0	0.2	1	20	15	0	61	20	20	0.1	alter	FALSE	TRUE	0.5	3	scpa-2	repair-data-2					0.71	12.94	11	11.65	14.38	12	11.41	0.45	0.99	0.1	72805	0.5	0	0.01375	4000	0.18	0.100095	0.7	12.79	11	11.67	14.21	12	11.45	0.45	0.99	0.1
	scpa-repair-gen-45	exp-repair-gen-45-0	0.2	1	20	15	0	61	20	20	0	alter	FALSE	TRUE	0.5	3	scpa-2	repair-data-2					0.81	14.41	12	11.37	14.42	12	11.37	0.38	0.99	0	72805	0.5	0	0.01675	4000	0.18	0.100095	0.8	14.19	12	11.29	14.19	12	11.29	0.39	0.99	0
	scpa-repair-gen-46		0.2	1	20	15	0	61	20	20	0.3	alter	FALSE	TRUE	0.5	3	scpa-2	repair-data-2					0.51	10.19	6	11.97	14.56	12	11.88	0.57	0.99	0.3	72805	0.5	0	0.01575	4000	0.18	0.100095	0.5	9.99	6	11.87	14.27	12	11.84	0.57	0.99	0.3
	scpa-repair-gen-47									20	0.1	remove	FALSE	TRUE	0.5	3	scpa-2	repair-data-2					0	7.27	5	6.54	8.08	8	6.4	0.57	1	0.1	15004	0.65	0			0.88	0.0687053	0	7.02	4	6.48	7.8	7	6.36	0.59	1	0.1
	scpa-repair-gen-48									20	0	remove	FALSE	TRUE	0.5	3	scpa-2	repair-data-2					0	8.08	8	6.4	8.08	8	6.4	0.52	1	0	13504	0.67	0			0.98	0.0687069	0	7.8	7	6.36	7.8	7	6.36	0.54	1	0
	scpa-repair-gen-49									20	0.3	remove	FALSE	TRUE	0.5	3	scpa-2	repair-data-2					0	5.65	2	6.51	8.08	8	6.4	0.67	1	0.3	19291	0.6	0			0.69	0.068706	0	5.46	2	6.41	7.8	7	6.36	0.68	1	0.3
	scpa-repair-gen-50									100	1	remove	FALSE	TRUE	0.5	3	scpa-2	repair-data-2					0	19.25	1	27.33	35.55	29	28.29	0.57	0.84	0.46	65685	0.5	0			0.54	0.0710613	0	16.99	1	26.17	33.26	26	28.27	0.61	0.86	0.49
	scpa-repair-gen-51	exp-repair-gen-51-1	0.2	1	100	15	0	61	20	100	0.1	alter	FALSE	TRUE	0.5	3	scpa-2	repair-data-2					0.41	23.8	15	24.49	26.45	19	24.42	0.34	0.85	0.1	72805	0.5	0	0.01875	4000	0.48	0.100095	0.43	22.23	14	23.61	24.7	17	23.64	0.36	0.86	0.1
	scpa-repair-gen-52	exp-repair-gen-52-0	0.2	1	100	15	0	61	20	100	0	alter	FALSE	TRUE	0.5	3	scpa-2	repair-data-2					0.51	25.19	17	23.7	25.19	17	23.7	0.29	0.84	0	72805	0.5	0	0.0195	4000	0.48	0.100095	0.53	23.65	16	22.87	23.65	16	22.87	0.3	0.86	0
	scpa-repair-gen-53		0.2	1	100	15	0	61	20	100	0.3	alter	FALSE	TRUE	0.5	3	scpa-2	repair-data-2					0.21	20.93	11	25.8	29.9	22	26.12	0.47	0.85	0.3	72805	0.5	0	0.01825	4000	0.48	0.100095	0.23	19.35	10	24.79	27.64	20	25.46	0.49	0.87	0.3
	scpa-repair-gen-54									100	0.1	remove	FALSE	TRUE	0.5	3	scpa-2	repair-data-2					0	32	25	28.88	35.55	29	28.29	0.28	0.73	0.1	39516	0.56	0			0.89	0.0734734	0	29.93	22	28.62	33.26	26	28.27	0.31	0.75	0.1
	scpa-repair-gen-55									100	0	remove	FALSE	TRUE	0.5	3	scpa-2	repair-data-2					0	35.55	29	28.29	35.55	29	28.29	0.2	0.7	0	35564	0.57	0			0.99	0.073473	0	33.26	26	28.27	33.26	26	28.27	0.23	0.72	0
	scpa-repair-gen-56									100	0.3	remove	FALSE	TRUE	0.5	3	scpa-2	repair-data-2					0	24.89	13	28.74	35.55	29	28.29	0.44	0.79	0.3	50806	0.53	0			0.69	0.0734734	0	23.28	12	28.14	33.26	26	28.27	0.46	0.81	0.3
	scpa-repair-gen-57									50	1	remove	FALSE	FALSE	0.5	3	scpa-2	repair-data-2					0	15.85	13	15.1	19.54	18	14.45	0.42	0.99	0.19	48921	0.54	0.3			0.51	0.0696853	0	14.17	11	14.78	18.36	15	14.36	0.47	0.99	0.23
	scpa-repair-gen-58		0.2	1	50	15	0	61	20	50	0.1	alter	FALSE	FALSE	0.5	3	scpa-2	repair-data-2					0.36	17.2	14	14.75	19.11	16	14.33	0.36	0.98	0.1	72805	0.5	0.2	0.01775	4000	0.34	0.100095	0.36	16.44	13	14.5	18.26	15	14.15	0.38	0.98	0.1
	scpa-repair-gen-59		0.2	1	50	15	0	61	20	50	0	alter	FALSE	FALSE	0.5	3	scpa-2	repair-data-2					0.46	18.45	15	13.99	18.45	15	13.99	0.31	0.98	0	72805	0.5	0.2	0.01575	4000	0.34	0.100095	0.46	17.73	14	13.85	17.73	14	13.85	0.32	0.98	0
	scpa-repair-gen-60									50	0.1	remove	FALSE	FALSE	0.5	3	scpa-2	repair-data-2					0	17.59	15	14.91	19.54	18	14.45	0.35	0.99	0.1	44082	0.53	0.33			0.56	0.0717309	0	16.53	13	14.69	18.36	15	14.36	0.38	0.99	0.1
	scpa-repair-gen-61									50	0	remove	FALSE	FALSE	0.5	3	scpa-2	repair-data-2					0	19.54	18	14.45	19.54	18	14.45	0.28	0.99	0	39674	0.52	0.37			0.62	0.071731	0	18.36	15	14.36	18.36	15	14.36	0.31	0.99	0
	scpa-repair-gen-62									20	1	remove	FALSE	FALSE	0.5	3	scpa-2	repair-data-2					0	5.82	2	6.59	8.29	9	6.44	0.66	1	0.3	31007	0.59	0.27			0.43	0.0667321	0	5.32	1	6.45	8	7	6.41	0.69	1	0.34
	scpa-repair-gen-63		0.2	1	20	15	0	61	20	20	0.1	alter	FALSE	FALSE	0.5	3	scpa-2	repair-data-2					0.6	12.85	11	12.06	14.28	12	11.88	0.45	0.99	0.1	72805	0.5	0.11	0.01625	4000	0.18	0.100095	0.58	12.46	11	11.93	13.85	12	11.79	0.46	0.99	0.1
	scpa-repair-gen-64		0.2	1	20	15	0	61	20	20	0	alter	FALSE	FALSE	0.5	3	scpa-2	repair-data-2					0.7	13.99	12	11.58	13.99	12	11.58	0.39	0.99	0	72805	0.5	0.11	0.017	4000	0.18	0.100095	0.68	13.72	12	11.53	13.72	12	11.53	0.4	0.99	0
	scpa-repair-gen-65									20	0.1	remove	FALSE	FALSE	0.5	3	scpa-2	repair-data-2					0	7.46	6	6.59	8.29	9	6.44	0.56	1	0.1	24178	0.58	0.34			0.55	0.0689234	0	7.2	4	6.54	8	7	6.41	0.58	1	0.1
	scpa-repair-gen-66									20	0	remove	FALSE	FALSE	0.5	3	scpa-2	repair-data-2					0	8.29	9	6.44	8.29	9	6.44	0.51	1	0	21760	0.58	0.38			0.61	0.0689229	0	8	7	6.41	8	7	6.41	0.53	1	0
	scpa-repair-gen-67									100	1	remove	FALSE	FALSE	0.5	3	scpa-2	repair-data-2					0	28.77	21	28.1	33.69	26	27.54	0.32	0.77	0.15	63307	0.51	0.29			0.56	0.0710676	0	26.02	16	27.81	31.82	24	27.59	0.37	0.79	0.18
	scpa-repair-gen-68		0.2	1	100	15	0	61	20	100	0.1	alter	FALSE	FALSE	0.5	3	scpa-2	repair-data-2					0.16	27.96	21	26.7	31.06	24	26.38	0.3	0.79	0.1	72805	0.5	0.25	0.02125	4000	0.48	0.100095	0.18	26.08	18	26.21	28.97	21	26.06	0.33	0.81	0.1
	scpa-repair-gen-69		0.2	1	100	15	0	61	20	100	0	alter	FALSE	FALSE	0.5	3	scpa-2	repair-data-2					0.26	29.15	22	25.82	29.15	22	25.82	0.25	0.79	0	72805	0.5	0.25	0.018	4000	0.48	0.100095	0.28	27.37	19	25.36	27.37	19	25.36	0.27	0.81	0
	scpa-repair-gen-70									100	0.1	remove	FALSE	FALSE	0.5	3	scpa-2	repair-data-2					0	30.32	24	28.02	33.69	26	27.54	0.29	0.75	0.1	60067	0.51	0.31			0.59	0.0728706	0	28.64	21	27.86	31.82	24	27.59	0.31	0.77	0.1
	scpa-repair-gen-71									100	0	remove	FALSE	FALSE	0.5	3	scpa-2	repair-data-2					0	33.69	26	27.54	33.69	26	27.54	0.21	0.73	0	54060	0.49	0.34			0.65	0.0728703	0	31.82	24	27.59	31.82	24	27.59	0.23	0.75	0
	scpa-repair-gen-72									300	0	remove	FALSE	TRUE	0.5	1	scpa-2	repair-data-2					0	61.62	51	47.31	61.62	51	47.31	0.09	0.49	0	11295	0.5	0			1	0.110745	0	60.56	50	47.02	60.56	50	47.02	0.1	0.5	0
scpa-repair-gen-72 + scpa-repair-gen-16 combined	scpa-repair-gen-73	exp-repair-gen-73-0	0.2	1	100	15	0	61	20	300			FALSE	TRUE	0.5	1	scpa-2	repair-data-2					0.69	40.77	29	35.82	40.78	29	35.82	0.12	0.71	0	36295	0.5	0			0.31	0.103113	0.72	39.77	29	34.76	39.77	29	34.76	0.12	0.72	0
	scpa-repair-gen-74									300	0	remove	FALSE	TRUE	0.5	3	scpa-2	repair-data-2					0	52.9	38	48.18	52.9	38	48.18	0.17	0.58	0	42684	0.56	0			0.99	0.104739	0	50.1	34	48.2	50.1	34	48.2	0.19	0.61	0
scpa-repair-gen-74 + scpa-repair-gen-16 combined	scpa-repair-gen-75	exp-repair-gen-75-0	0.2	1	100	15	0	61	20	300			FALSE	TRUE	0.5	3	scpa-2	repair-data-2					0.37	44.94	31	42.21	44.94	31	42.21	0.15	0.67	0	67684	0.54	0			0.62	0.102937	0.38	42.98	29	41.63	42.98	29	41.63	0.17	0.69	0
	scpa-repair-gen-76	exp-repair-gen-76-0	0.2	1	20	5	0	61	20	50	0.1	alter	FALSE	TRUE	0.5	1	scpa-2	repair-data-2					0.67	10.89	7	11.5	12.11	8	11.5	0.58	1	0.1	24563	0.5	0	0.0475	4000	0.23	0.100023	0.69	10.39	7	11.04	11.55	8	11.04	0.6	1	0.1
	scpa-repair-gen-77	exp-repair-gen-77-0	0.2	1	50	15	0	61	20	50	0.1	alter	TRUE	FALSE	0.5	1	scpa-2	repair-data-2	1	2	3	4	0.52	17.02	14	14.18	18.91	16	13.7	0.36	0.98	0.1	24563	0.5	0.15	0.01725	4000	0.23	0.100023	0.66	14.77	12	12.97	16.41	13	12.65	0.42	0.99	0.1
	scpa-repair-gen-78	exp-repair-gen-78-0	0.2	1	50	15	0	61	20	50	0	alter	TRUE	FALSE	0.5	1	scpa-2	repair-data-2	1	2	3	4	0.62	18.29	15	13.53	18.29	15	13.53	0.31	0.98	0	24563	0.5	0.15	0.016	4000	0.23	0.100023	0.76	16.12	13	12.43	16.12	13	12.43	0.36	0.99	0
	scpa-repair-gen-79	exp-repair-gen-79-0	0.2	1	50	15	0	61	20	50	0.3	alter	TRUE	FALSE	0.5	1	scpa-2	repair-data-2	1	2	3	4	0.32	14.78	11	15.49	21.12	19	14.45	0.47	0.98	0.3	24563	0.5	0.15	0.0235	4000	0.23	0.100023	0.46	12.06	8	13.64	17.24	14	13.3	0.54	0.99	0.3
	scpa-repair-gen-80									50	0.1	remove	TRUE	FALSE	0.5	1	scpa-2	repair-data-2	1	2	3	4	0	20.56	20	15.08	22.84	22	14.16	0.28	0.99	0.1	10238	0.46	0.35			0.55	0.139507	0	17.79	15	15.32	19.76	18	14.89	0.38	0.99	0.1
	scpa-repair-gen-81									50	0	remove	TRUE	FALSE	0.5	1	scpa-2	repair-data-2	1	2	3	4	0	22.84	22	14.16	22.84	22	14.16	0.2	0.98	0	9214	0.43	0.39			0.61	0.139505	0	19.76	18	14.89	19.76	18	14.89	0.31	0.99	0
	scpa-repair-gen-82	exp-repair-gen-82-0								50	0.3	remove	TRUE	FALSE	0.5	1	scpa-2	repair-data-2	1	2	3	4	0	15.99	13	15.81	22.84	22	14.16	0.44	0.99	0.3	13163	0.5	0.27			0.43	0.139507	0	13.84	7	15.4	19.76	18	14.89	0.52	0.99	0.3
	scpa-repair-gen-83		0.2	1	20	15	0	61	20	20	0.1	alter	TRUE	FALSE	0.5	1	scpa-2	repair-data-2	1	2	3	4	0.73	13.4	11	11.86	14.88	13	11.58	0.43	0.99	0.1	24563	0.5	0.08	0.023	4000	0.1	0.100023	0.77	12.75	11	11.33	14.17	12	11.07	0.46	0.99	0.1
	scpa-repair-gen-84	exp-repair-gen-84-0	0.2	1	20	15	0	61	20	20	0	alter	TRUE	FALSE	0.5	1	scpa-2	repair-data-2	1	2	3	4	0.83	14.51	12	11.27	14.51	12	11.27	0.38	0.99	0	24563	0.5	0.08	0.01575	4000	0.1	0.100023	0.87	14.13	12	10.93	14.13	12	10.93	0.4	0.99	0
	scpa-repair-gen-85	exp-repair-gen-85-0	0.2	1	20	15	0	61	20	20	0.3	alter	TRUE	FALSE	0.5	1	scpa-2	repair-data-2	1	2	3	4	0.53	11.11	8	12.53	15.87	13	12.19	0.54	0.99	0.3	24563	0.5	0.08	0.01925	4000	0.1	0.100023	0.57	10.07	6	11.64	14.39	12	11.46	0.58	0.99	0.3
	scpa-repair-gen-86									20	0.1	remove	TRUE	FALSE	0.5	1	scpa-2	repair-data-2	1	2	3	4	0	8.94	10	6.72	9.94	12	6.34	0.48	1	0.1	4731	0.49	0.39			0.51	0.122397	0	7.38	5	6.52	8.19	7	6.37	0.61	1	0.1
	scpa-repair-gen-87									20	0	remove	TRUE	FALSE	0.5	1	scpa-2	repair-data-2	1	2	3	4	0	9.94	12	6.34	9.94	12	6.34	0.43	1	0	4258	0.47	0.44			0.56	0.122399	0	8.19	7	6.37	8.19	7	6.37	0.56	1	0
	scpa-repair-gen-88									20	0.3	remove	TRUE	FALSE	0.5	1	scpa-2	repair-data-2	1	2	3	4	0	6.96	4	6.99	9.94	12	6.34	0.6	1	0.3	6083	0.53	0.31			0.39	0.122402	0	5.74	2	6.52	8.19	7	6.37	0.7	1	0.3
	scpa-repair-gen-89		0.2	1	100	15	0	61	20	100	0.1	alter	TRUE	FALSE	0.5	1	scpa-2	repair-data-2	1	2	3	4	0.34	27.33	19	26.27	30.37	22	25.97	0.31	0.8	0.1	24563	0.5	0.2	0.02025	4000	0.37	0.100023	0.56	20.05	13	21.69	22.28	15	21.75	0.39	0.89	0.1
	scpa-repair-gen-90	exp-repair-gen-90-0	0.2	1	100	15	0	61	20	100	0	alter	TRUE	FALSE	0.5	1	scpa-2	repair-data-2	1	2	3	4	0.44	28.58	20	25.38	28.58	20	25.38	0.25	0.8	0	24563	0.5	0.2	0.01925	4000	0.37	0.100023	0.66	21.42	14	21.02	21.43	14	21.02	0.33	0.89	0
	scpa-repair-gen-91		0.2	1	100	15	0	61	20	100	0.3	alter	TRUE	FALSE	0.5	1	scpa-2	repair-data-2	1	2	3	4	0.14	25.01	15	27.77	35.72	29	26.81	0.41	0.8	0.3	24563	0.5	0.2	0.0189759	4000	0.37	0.100023	0.36	17.3	9	22.71	24.71	17	23.53	0.51	0.89	0.3
	scpa-repair-gen-92									100	0.1	remove	TRUE	FALSE	0.5	1	scpa-2	repair-data-2	1	2	3	4	0	35.69	30	28.72	39.65	34	27.56	0.22	0.69	0.1	15416	0.45	0.32			0.58	0.146241	0	31.57	24	28.67	35.08	29	28.11	0.3	0.73	0.1
	scpa-repair-gen-93									100	0	remove	TRUE	FALSE	0.5	1	scpa-2	repair-data-2	1	2	3	4	0	39.65	34	27.56	39.65	34	27.56	0.13	0.65	0	13874	0.42	0.35			0.65	0.146238	0	35.08	29	28.11	35.08	29	28.11	0.22	0.7	0
	scpa-repair-gen-94									100	0.3	remove	TRUE	FALSE	0.5	1	scpa-2	repair-data-2	1	2	3	4	0	27.76	19	29.36	39.65	34	27.56	0.39	0.76	0.3	19820	0.5	0.25			0.45	0.146237	0	24.55	13	28.49	35.08	29	28.11	0.46	0.79	0.3
	scpa-repair-gen-95		0.2	1	50	15	0	61	20	50	0.1	alter	TRUE	FALSE	0.5	3	scpa-2	repair-data-2	1	2	3	4	0.36	17.17	14	14.7	19.07	16	14.28	0.36	0.98	0.1	72805	0.5	0.2	0.01475	4000	0.34	0.100095	0.51	14.26	11	13.22	15.84	13	13	0.44	0.99	0.1
	scpa-repair-gen-96	exp-repair-gen-96-0	0.2	1	50	15	0	61	20	50	0	alter	TRUE	FALSE	0.5	3	scpa-2	repair-data-2	1	2	3	4	0.46	18.46	15	13.99	18.46	15	13.99	0.31	0.98	0	72805	0.5	0.2	0.02025	4000	0.34	0.100095	0.61	15.7	13	12.77	15.7	13	12.77	0.38	0.99	0
	scpa-repair-gen-97		0.2	1	50	15	0	61	20	50	0.3	alter	TRUE	FALSE	0.5	3	scpa-2	repair-data-2	1	2	3	4	0.33	16.92	14	14.95	19.38	17	14.43	0.38	0.98	0.13	72805	0.5	0.2	0.02375	4000	0.34	0.100095	0.31	11.4	6	13.63	16.28	13	13.64	0.56	0.99	0.3
	scpa-repair-gen-98	exp-repair-gen-98-0								50	0.1	remove	TRUE	FALSE	0.5	3	scpa-2	repair-data-2	1	2	3	4	0	17.59	15	14.91	19.54	18	14.45	0.35	0.99	0.1	44082	0.53	0.33			0.56	0.130704	0	14.17	11	14.27	15.74	12	14.19	0.47	0.99	0.1
	scpa-repair-gen-99									50	0	remove	TRUE	FALSE	0.5	3	scpa-2	repair-data-2	1	2	3	4	0	19.54	18	14.45	19.54	18	14.45	0.28	0.99	0	39674	0.52	0.37			0.62	0.130704	0	15.74	12	14.19	15.74	12	14.19	0.41	0.99	0
	scpa-repair-gen-100									50	0.3	remove	TRUE	FALSE	0.5	3	scpa-2	repair-data-2	1	2	3	4	0	15.85	13	15.1	19.54	18	14.45	0.42	0.99	0.19	48921	0.54	0.3			0.51	0.11697	0	11.02	3	13.89	15.74	12	14.19	0.58	0.99	0.3
	scpa-repair-gen-101		0.2	1	20	15	0	61	20	20	0.1	alter	TRUE	FALSE	0.5	3	scpa-2	repair-data-2	1	2	3	4	0.6	12.74	11	12	14.15	12	11.83	0.45	0.99	0.1	72805	0.5	0.11	0.01625	4000	0.18	0.100095	0.64	11.96	10	11.29	13.29	11	11.14	0.48	0.99	0.1
	scpa-repair-gen-102	exp-repair-gen-102-0	0.2	1	20	15	0	61	20	20	0	alter	TRUE	FALSE	0.5	3	scpa-2	repair-data-2	1	2	3	4	0.7	13.98	12	11.57	13.98	12	11.57	0.4	0.99	0	72805	0.5	0.11	0.01525	4000	0.18	0.100095	0.74	13.36	11	11.03	13.36	11	11.03	0.42	0.99	0
	scpa-repair-gen-103		0.2	1	20	15	0	61	20	20	0.3	alter	TRUE	FALSE	0.5	3	scpa-2	repair-data-2	1	2	3	4	0.57	12.42	11	12.04	14.23	12	11.85	0.46	0.99	0.13	72805	0.5	0.11	0.01775	4000	0.18	0.100095	0.44	9.14	4	11.28	13.06	11	11.43	0.61	0.99	0.3
	scpa-repair-gen-104									20	0.1	remove	TRUE	FALSE	0.5	3	scpa-2	repair-data-2	1	2	3	4	0	7.46	6	6.59	8.29	9	6.44	0.56	1	0.1	24178	0.58	0.34			0.55	0.112672	0	6.33	3	6.22	7.03	4	6.17	0.65	1	0.1
	scpa-repair-gen-105									20	0	remove	TRUE	FALSE	0.5	3	scpa-2	repair-data-2	1	2	3	4	0	8.29	9	6.44	8.29	9	6.44	0.51	1	0	21760	0.58	0.38			0.61	0.112671	0	7.03	4	6.17	7.03	4	6.17	0.61	1	0
	scpa-repair-gen-106									20	0.3	remove	TRUE	FALSE	0.5	3	scpa-2	repair-data-2	1	2	3	4	0	5.82	2	6.59	8.29	9	6.44	0.66	1	0.3	31007	0.59	0.27			0.43	0.112444	0	4.92	1	6.09	7.03	4	6.17	0.73	1	0.3
	scpa-repair-gen-107		0.2	1	100	15	0	61	20	100	0.1	alter	TRUE	FALSE	0.5	3	scpa-2	repair-data-2	1	2	3	4	0.16	27.94	21	26.7	31.04	24	26.37	0.3	0.79	0.1	72805	0.5	0.25	0.0185	4000	0.48	0.100095	0.41	19.73	13	22.1	21.93	14	22.24	0.41	0.89	0.1
	scpa-repair-gen-108	exp-repair-gen-108-0	0.2	1	100	15	0	61	20	100	0	alter	TRUE	FALSE	0.5	3	scpa-2	repair-data-2	1	2	3	4	0.26	29.15	22	25.79	29.15	22	25.79	0.25	0.79	0	72805	0.5	0.25	0.01825	4000	0.48	0.100095	0.51	21.14	14	21.48	21.14	14	21.48	0.35	0.89	0
	scpa-repair-gen-109		0.2	1	100	15	0	61	20	100	0.3	alter	TRUE	FALSE	0.5	3	scpa-2	repair-data-2	1	2	3	4	0.13	27.6	20	26.93	31.62	25	26.52	0.32	0.79	0.13	72805	0.5	0.25	0.01675	4000	0.48	0.100095	0.21	16.86	7	23.04	24.08	15	24.18	0.53	0.89	0.3
	scpa-repair-gen-110									100	0.1	remove	TRUE	FALSE	0.5	3	scpa-2	repair-data-2	1	2	3	4	0	30.32	24	28.02	33.69	26	27.54	0.29	0.75	0.1	60067	0.51	0.31			0.59	0.138236	0	24.81	14	27.01	27.57	18	27.1	0.39	0.81	0.1
	scpa-repair-gen-111									100	0	remove	TRUE	FALSE	0.5	3	scpa-2	repair-data-2	1	2	3	4	0	33.69	26	27.54	33.69	26	27.54	0.21	0.73	0	54060	0.49	0.34			0.65	0.138235	0	27.57	18	27.1	27.57	18	27.1	0.32	0.79	0
	scpa-repair-gen-112									100	0.3	remove	TRUE	FALSE	0.5	3	scpa-2	repair-data-2	1	2	3	4	0	28.77	21	28.1	33.69	26	27.54	0.32	0.77	0.15	63307	0.51	0.29			0.56	0.119223	0	19.3	6	25.96	27.57	18	27.1	0.52	0.85	0.3
	scpa-repair-gen-raw-1												FALSE	FALSE	0.5	1	scpa-2	repair-data-2					0	39.52	22	47.14	57.36	44	46.92	0.38	0.68	0.31	24563	0.5	0.23			0.46	0.100023	0	34.66	14	45.78	56.7	44	46.67	0.46	0.72	0.39
	scpa-repair-gen-raw-2												FALSE	FALSE	0.5	3	scpa-2	repair-data-2					0	43.26	27	46.96	49.55	34	47.06	0.28	0.67	0.13	72805	0.5	0.29			0.58	0.100095	0	39.74	23	46.54	47.33	31	47.12	0.33	0.7	0.16
	scpa-repair-gen-raw-3												FALSE	TRUE	0.5	1	scpa-2	repair-data-2					0	39.52	22	47.14	57.36	44	46.92	0.38	0.68	0.31	24563	0.5	0.23			0.46	0.100023	0	24.51	0	42.17	60.56	50	47.02	0.64	0.8	0.6
	scpa-repair-gen-raw-4												FALSE	TRUE	0.5	3	scpa-2	repair-data-2					0	43.26	27	46.96	49.55	34	47.06	0.28	0.67	0.13	72805	0.5	0.29			0.58	0.100095	0	27.74	1	43.67	50.1	34	48.2	0.55	0.78	0.45
	scpa-repair-gen-raw-5												TRUE	FALSE	0.5	1	scpa-2	repair-data-2	1	2	3	4	0	39.52	22	47.14	57.36	44	46.92	0.38	0.68	0.31	24563	0.5	0.23			0.46	0.100023	0	20.49	0	38.43	50.64	37	46.07	0.67	0.84	0.6
	scpa-repair-gen-raw-6												TRUE	FALSE	0.5	3	scpa-2	repair-data-2	1	2	3	4	0	43.26	27	46.96	49.55	34	47.06	0.28	0.67	0.13	72805	0.5	0.29			0.58	0.100095	0	22.76	1	39.67	41.1	24	45.69	0.6	0.83	0.45
	scpa-repair-gen-raw-7									50	0.1	remove	TRUE	FALSE	0.5	1	scpa-2	repair-data-2					0	39.52	22	47.14	57.36	44	46.92	0.38	0.68	0.31	24563	0.5	0.23			0.46	0.100023	0	20.49	0	38.43	50.64	37	46.07	0.67	0.84	0.6
[truncated: 24 more columns]
