# Supplementary material
Source: ML conference proceedings conference paper supplement (https://openreview.net/forum?id=SEcSahl0Ql)
Supplement: supplementary_material [file models.xlsx]

## Sheet: experiments
	Parameters																											Evaluation
				Embedding Size		Input/Target Length				Networks										Attention								on dataset												on pipeline
				Decoder	Encoder					Dropout		Network Size				Activation Function				Encoder						Decoder						Val						test		val
										Encoder	Decoder	Deoder	Encoder			Decoder	Encoder			Heads			Layers			Heads	Layers									Semantic Beam Accuracy		Semantic Beam Accuracy					Repeats: 10, Beam Base: 1, Beam Repair: 1, keep: all					Repeats: 5, Beam Base: 16, Beam Repair: 16, keep: best
Name	dataset_name	steps	warmup_steps	d_embed_dec	d_embed_enc	max_input_length	max_target_length	num_properties	property_tree_size	dropout_enc	dropout_dec	d_ff_dec	d_ff_enc_g	d_ff_enc_l1	d_ff_enc_l2	ff_activation_dec	ff_activation_enc_g	ff_activation_enc_l1	ff_activation_enc_l2	num_heads_enc_g	num_heads_enc_l1	num_heads_enc_l2	num_layers_enc_g	num_layers_enc_l1	num_layers_enc_l2	num_heads_dec	num_layers_dec	accuracy	loss	accuracy_per_sequence	best_epoch	best_val_accuracy_per_sequence	val_accuracy	val_accuracy_per_sequence	val_loss	b1	b16	b1	b16	sem_overall_accuracy/best	syn_overall_accuracy/best	enc_overall_accuracy/best	sem_improvement_accuracy	sem_overall_accuracy	syn_improvement_accuracy	syn_overall_accuracy	enc_overall_accuracy	sem_improvement_accuracy	sem_overall_accuracy
exp-repair-gen-96-0	scpa-repair-gen-96	20000	4000	256	256	128	128	12	25	0	0	1024	1024	1024	1024	relu	relu	relu	relu	4	4	4	4	4	4	4	8	0.969696	0.0308364	0.465078	192	0.326309	0.950043	0.323572	0.0627055	0.59082	0.824219	0.584403	0.846989	0.862305	0.491699	0.873393	0.0845771	0.621891	0.0258706	0.332338	0.623131	0.0673828	0.862305
exp-repair-gen-108-0	scpa-repair-gen-108	20000	4000	256	256	128	128	12	25	0	0	1024	1024	1024	1024	relu	relu	relu	relu	4	4	4	4	4	4	4	8	0.952729	0.0482825	0.384727	199	0.252077	0.914397	0.252077	0.108839	0.535156	0.791992	0.546535	0.784158	0.847656	0.484375	0.859406	0.0782014	0.618768	0.0195503	0.333333	0.626733	0.0683594	0.847656
exp-repair-gen-51-1	scpa-repair-gen-51	20000	4000	256	256	128	128	12	25	0	0	1024	1024	1024	1024	relu	relu	relu	relu	4	4	4	4	4	4	4	8	0.95311	0.0498075	0.413984	193	0.370337	0.932323	0.367779	0.0807034	0.513672	0.804688	0.531157	0.803165	0.841797	0.50293	0.852621	0.0363458	0.600196	0.0137525	0.333988	0.607356	0.0585938	0.841797
exp-repair-gen-37-0	scpa-repair-gen-37	20000	4000	256	256	128	128	12	25	0	0	1024	1024	1024	1024	relu	relu	relu	relu	4	4	4	4	4	4	4	8	0.966963	0.0350662	0.465234	198	0.413251	0.957207	0.411229	0.0490701	0.574219	0.828125	0.589163	0.838424	0.851562	0.48368	0.859961	0.0284593	0.567223	0.0107949	0.322866	0.571711	0.0693359	0.851562
exp-repair-gen-90-0	scpa-repair-gen-90	20000	4000	256	256	128	128	12	25	0	0	1024	1024	1024	1024	relu	relu	relu	relu	4	4	4	4	4	4	4	8	0.957399	0.042935	0.499141	196	0.292763	0.905388	0.288158	0.129988	0.52832	0.770508	0.533203	0.775391	0.84375	0.470703	0.854599	0.0656863	0.608824	0.00980392	0.337255	0.617296	0.0419922	0.84375
exp-repair-gen-52-0	scpa-repair-gen-52	20000	4000	256	256	128	128	12	25	0	0	1024	1024	1024	1024	relu	relu	relu	relu	4	4	4	4	4	4	4	8	0.949071	0.0535109	0.371289	197	0.329404	0.927694	0.326818	0.0842545	0.524414	0.785156	0.536946	0.795074	0.836292	0.476331	0.839126	0.0539216	0.567647	0.0107843	0.29902	0.576693	0.0537109	0.825195
exp-repair-gen-38-0	scpa-repair-gen-38	20000	4000	256	256	128	128	12	25	0	0	1024	1024	1024	1024	relu	relu	relu	relu	4	4	4	4	4	4	4	8	0.967827	0.0339692	0.450859	198	0.402069	0.957206	0.398878	0.0488699	0.580078	0.819336	0.594675	0.844181	0.866337	0.479208	0.836775	0.0813725	0.616667	0.0186275	0.342157	0.620928	0.0585938	0.831055
exp-repair-gen-78-0	scpa-repair-gen-78	20000	4000	256	256	128	128	12	25	0	0	1024	1024	1024	1024	relu	relu	relu	relu	4	4	4	4	4	4	4	8	0.975949	0.0233654	0.574492	178	0.339844	0.942526	0.331538	0.0861876	0.564453	0.790039	0.55957	0.788086	0.829102	0.452148	0.843936	0.0550639	0.636185	0.00884956	0.32645	0.650251	0.0410156	0.829102
exp-repair-gen-44-0	scpa-repair-gen-44	20000	4000	256	256	128	128	12	25	0	0	1024	1024	1024	1024	relu	relu	relu	relu	4	4	4	4	4	4	4	8	0.976688	0.0254184	0.522187	197	0.472532	0.970525	0.470634	0.0339824	0.634766	0.861328	0.643211	0.859267	0.853465	0.459406	0.833499	0.024558	0.563851	0.00884086	0.343811	0.572283	0.0439453	0.821289
exp-repair-gen-45-0	scpa-repair-gen-45	20000	4000	256	256	128	128	12	25	0	0	1024	1024	1024	1024	relu	relu	relu	relu	4	4	4	4	4	4	4	8	0.976912	0.0246924	0.51707	197	0.46615	0.971034	0.466027	0.0328989	0.638672	0.871094	0.662389	0.866732	0.851085	0.488281	0.840237	0.0568071	0.600392	0.0127326	0.32811	0.60995	0.0488281	0.832031
exp-repair-gen-2-0	scpa-repair-gen-2	20000	4000	256	256	128	128	12	25	0	0	1024	1024	1024	1024	relu	relu	relu	relu	4	4	4	4	4	4	4	8	0.975526	0.0245518	0.573242	184	0.417393	0.950823	0.414309	0.0686663	0.555664	0.790039	0.550781	0.787109	0.825195	0.467773	0.838294	0.0569185	0.578999	0.0117763	0.335623	0.587065	0.0458984	0.825195
exp-repair-gen-16-0	scpa-repair-gen-16	20000	4000	256	256	128	128	12	25	0	0	1024	1024	1024	1024	relu	relu	relu	relu	4	4	4	4	4	4	4	8	0.955393	0.0456936	0.491094	198	0.371382	0.919968	0.357977	0.102399	0.515625	0.765625	0.529297	0.777344	0.844862	0.468379	0.83996	0.0609037	0.590373	0.0147348	0.317289	0.59801	0.0400391	0.825195
exp-repair-gen-51-0	scpa-repair-gen-51	20000	4000	256	256	128	128	12	25	0	0	1024	1024	1024	1024	relu	relu	relu	relu	4	4	4	4	4	4	4	8	0.947997	0.0550313	0.375664	199	0.341783	0.928632	0.341783	0.0846544	0.460938	0.75293	0.512364	0.795252	0.858835	0.489635	0.840909	0.0392542	0.552502	0.0127576	0.316977	0.562438	0.0517578	0.831055
exp-repair-gen-73-0	scpa-repair-gen-73	20000	4000	256	256	128	128	12	25	0	0	1024	1024	1024	1024	relu	relu	relu	relu	4	4	4	4	4	4	4	8	0.937492	0.0747928	0.296367	199	0.233594	0.894494	0.233594	0.153475	0.37207	0.655273	0.383333	0.673529	0.848425	0.482283	0.837784	0.0719212	0.613793	0.0137931	0.333005	0.623	0.0458984	0.827148
exp-repair-gen-15-0	scpa-repair-gen-15	20000	4000	256	256	128	128	12	25	0	0	1024	1024	1024	1024	relu	relu	relu	relu	4	4	4	4	4	4	4	8	0.952398	0.0490841	0.486797	152	0.362377	0.915258	0.354441	0.109756	0.479492	0.722656	0.475586	0.725586	0.838424	0.473633	0.830875	0.0215264	0.53229	0.00782779	0.311155	0.539148	0.0380859	0.825195
exp-repair-gen-8-0	scpa-repair-gen-8	20000	4000	256	256	128	128	12	25	0	0	1024	1024	1024	1024	relu	relu	relu	relu	4	4	4	4	4	4	4	8	0.985922	0.0140634	0.647734	165	0.462212	0.965414	0.455798	0.0513134	0.582031	0.818359	0.59668	0.838867	0.822026	0.468043	0.828882	0.021611	0.571709	0.00196464	0.315324	0.577381	0.0292969	0.818359
exp-repair-gen-102-0	scpa-repair-gen-102	20000	4000	256	256	128	128	12	25	0	0	1024	1024	1024	1024	relu	relu	relu	relu	4	4	4	4	4	4	4	8	0.975447	0.0254039	0.490391	197	0.409799	0.967033	0.407337	0.0405294	0.647461	0.856445	0.619425	0.859267	0.851562	0.462891	0.859113	0.0704501	0.600783	0.0176125	0.333659	0.607319	0.0576172	0.851562
exp-repair-gen-77-0	scpa-repair-gen-77	20000	4000	256	256	128	128	12	25	0	0	1024	1024	1024	1024	relu	relu	relu	relu	4	4	4	4	4	4	4	8	0.974565	0.0252829	0.554531	184	0.324342	0.938645	0.319449	0.0971362	0.533203	0.766602	0.532227	0.754883	0.826172	0.460938	0.840954	0.0374016	0.562992	0.00787402	0.312008	0.570289	0.0507812	0.826172
exp-repair-gen-1-0	scpa-repair-gen-1	20000	4000	256	256	128	128	12	25	0	0	1024	1024	1024	1024	relu	relu	relu	relu	4	4	4	4	4	4	4	8	0.974328	0.0262969	0.55668	171	0.420888	0.950453	0.411061	0.0685593	0.550781	0.803711	0.517578	0.779297	0.869048	0.478175	0.83613	0.0215475	0.525955	0.00195886	0.279138	0.535928	0.0527344	0.827148
exp-repair-gen-98-0	scpa-repair-gen-98	20000	4000	256	256	128	128	12	25	0	0	1024	1024	1024	1024	relu	relu	relu	relu	4	4	4	4	4	4	4	8	0.969212	0.0268865	0.385859	178	0.20959	0.911996	0.202828	0.112168	0.490234	0.80957	0.51049	0.808192	0.821289	0.476562	0.837649	0.0696078	0.593137	0.0137255	0.321569	0.599604	0.0361328	0.821289
exp-repair-gen-85-0	scpa-repair-gen-85	20000	4000	256	256	128	128	12	25	0	0	1024	1024	1024	1024	relu	relu	relu	relu	4	4	4	4	4	4	4	8	0.983316	0.016835	0.618789	134	0.417434	0.959987	0.413322	0.0630968	0.591797	0.791992	0.575195	0.796875	0.822266	0.464844	0.832839	0.00980392	0.52549	0.000980392	0.287255	0.531219	0.0371094	0.822266
exp-repair-gen-75-0	scpa-repair-gen-75	20000	4000	256	256	128	128	12	25	0	0	1024	1024	1024	1024	relu	relu	relu	relu	4	4	4	4	4	4	4	8	0.921515	0.0925383	0.231094	193	0.189461	0.859801	0.18401	0.213243	0.329102	0.631836	0.347826	0.657115	0.849609	0.49554	0.860534	0.0687623	0.633595	0.0176817	0.356582	0.641153	0.0302734	0.849609
exp-repair-gen-84-0	scpa-repair-gen-84	20000	4000	256	256	128	128	12	25	0	0	1024	1024	1024	1024	relu	relu	relu	relu	4	4	4	4	4	4	4	8	0.983653	0.0155103	0.614609	183	0.387788	0.959457	0.381908	0.0635031	0.576172	0.814453	0.611328	0.834961	0.836914	0.461914	0.844335	0.0500491	0.57998	0.013739	0.314033	0.59041	0.0439453	0.836914
exp-repair-gen-76-0	scpa-repair-gen-76	20000	4000	256	256	128	128	12	25	0	0	1024	1024	1024	1024	relu	relu	relu	relu	4	4	4	4	4	4	4	8	0.977386	0.0233298	0.609453	181	0.463158	0.958692	0.458717	0.0583227	0.547852	0.799805	0.579102	0.796875	0.827148	0.483398	0.840278	0.0127701	0.578585	0.00392927	0.321218	0.587824	0.0283203	0.827148
exp-repair-alter-19-0	scpa-repair-alter-19	20000	4000	256	256	128	128	12	25	0	0	1024	1024	1024	1024	relu	relu	relu	relu	4	4	4	4	4	4	4	8	0.977866	0.0231519	0.553359	182	0.405192	0.951217	0.3986	0.0719382	0.549805	0.772461	0.549805	0.776367	0.823413	0.443359	0.827723	0.00882353	0.537255	0	0.302941	0.543112	0.0419922	0.816406
exp-repair-alter-16-0	scpa-repair-alter-16	20000	4000	256	256	128	128	12	25	0	0	1024	1024	1024	1024	relu	relu	relu	relu	4	4	4	4	4	4	4	8	0.96825	0.0338257	0.492773	185	0.364909	0.933671	0.353638	0.093425	0.545898	0.786133	0.5625	0.788086	0.835317	0.479492	0.840237	0.00587659	0.541626	0.00587659	0.306562	0.548067	0.0449219	0.832031
exp-repair-alter-1-0	scpa-repair-alter-1	30000	4000	256	256	128	128	12	25	0	0	1024	1024	1024	1024	relu	relu	relu	relu	4	4	4	4	4	4	4	8	0.994014	0.00615984	0.79043	283	0.463786	0.96801	0.459839	0.0657094	0.624023	0.808594	0.614258	0.829102	0.813294	0.44868	0.825397	0.00980392	0.572549	0.000980392	0.343137	0.579365	0.0332356	0.813294
exp-repair-alter-13-0	scpa-repair-alter-13	20000	4000	256	256	128	128	12	25	0	0	1024	1024	1024	1024	relu	relu	relu	relu	4	4	4	4	4	4	4	8	0.992931	0.00772172	0.752031	199	0.571208	0.98363	0.571208	0.0269484	0.68457	0.896484	0.693359	0.898438	0.843719	0.459941	0.822948	0.00392157	0.561765	0.00196078	0.322549	0.566766	0.0390625	0.8125
exp-repair-gen-79-0	scpa-repair-gen-79	20000	4000	256	256	128	128	12	25	0	0	1024	1024	1024	1024	relu	relu	relu	relu	4	4	4	4	4	4	4	8	0.970548	0.0298743	0.525703	130	0.350041	0.936634	0.345806	0.0976082	0.55957	0.736328	0.584961	0.773438	0.825195	0.444336	0.838294	0.00394477	0.54142	0.000986193	0.285996	0.547358	0.0322266	0.825195
exp-repair-gen-82-0	scpa-repair-gen-82	20000	4000	256	256	128	128	12	25	0	0	1024	1024	1024	1024	relu	relu	relu	relu	4	4	4	4	4	4	4	8	0.984949	0.0140558	0.586094	61	0.262266	0.891379	0.24875	0.218777	0.504883	0.734375	0.508789	0.730469	0.804688	0.431641	0.81746	0.0362745	0.595098	0	0.335294	0.60479	0.0263672	0.804688
exp-repair-alter-21-0	scpa-repair-alter-21	20000	4000	256	256	128	128	12	25	0	0	1024	1024	1024	1024	relu	relu	relu	relu	4	4	4	4	4	4	4	8	0.974111	0.027037	0.537305	199	0.406087	0.949085	0.406087	0.0712464	0.603516	0.821289	0.584961	0.823242	0.809289	0.43083	0.817097	0.000979432	0.53477	0	0.314398	0.542205	0.0224609	0.802734
exp-repair-gen-96-1	scpa-repair-gen-96	20000	4000	256	256	128	128	12	25	0	0	1024	1024	1024	1024	relu	relu	relu	relu	4	4	4	4	4	6	4	6	0.953328	0.0470654	0.400234	175	0.275638	0.906954	0.272516	0.126136	0.541992	0.76839	0.518812	0.767327
exp-repair-gen-96-2	scpa-repair-gen-96	20000	4000	256	256	128	128	12	25	0	0	1024	1024	1024	1024	relu	relu	relu	relu	8	4	4	4	4	4	4	8	0.966682	0.0336231	0.441445	191	0.3077	0.947304	0.304756	0.0658412	0.583984	0.813241	0.588526	0.850643
exp-repair-gen-96-3	scpa-repair-gen-96	20000	4000	256	256	128	128	12	25	0	0	1024	1024	1024	1024	relu	relu	relu	relu	4	4	4	4	4	4	4	10	0.965381	0.035302	0.427969	197	0.305224	0.947895	0.304261	0.063663	0.584961	0.823937	0.566502	0.817734
exp-repair-gen-96-4	scpa-repair-gen-96	20000	4000	256	256	128	128	12	25	0	0	256	256	256	256	relu	relu	relu	relu	4	4	4	4	4	4	4	8	0.961459	0.0394426	0.394688	186	0.29008	0.945145	0.28821	0.0663401	0.525391	0.795455	0.563059	0.825223
exp-repair-gen-96-5	scpa-repair-gen-96	20000	4000	256	256	128	128	12	25	0	0	512	512	512	512	relu	relu	relu	relu	4	4	4	4	4	4	4	8	0.964378	0.0363653	0.423945	189	0.306214	0.947577	0.300479	0.0640844	0.572266	0.8199	0.583416	0.820336
exp-repair-gen-96-6	scpa-repair-gen-96	20000	4000	128	128	128	128	12	25	0	0	1024	1024	1024	1024	relu	relu	relu	relu	4	4	4	4	4	4	4	8	0.96296	0.0379427	0.419961	195	0.303903	0.946206	0.30228	0.0654049	0.532227	0.805169	0.589794	0.812561
exp-repair-gen-96-7	scpa-repair-gen-96	20000	4000	256	256	128	128	12	25	0	0	1024	1024	1024	1024	relu	relu	relu	relu	8	4	4	4	4	8	4	8	0.942786	0.0574033	0.321133	182	0.223537	0.894678	0.218544	0.136803	0.474609	0.727905	0.437561	0.716814
exp-repair-gen-96-8	scpa-repair-gen-96	20000	4000	256	256	128	128	12	25	0	0	256	256	256	256	relu	relu	relu	relu	8	4	4	8	4	8	4	8	0.915257	0.0849026	0.239297	191	0.191709	0.877469	0.1886	0.144759	0.422852	0.694965	0.407882	0.703448
[truncated: 28 more columns]
